# Supplementary material for: An all-aqueous and phosphine-free integrated amine-assisted CO2capture and catalytic conversion to formic acid
Source: Royal Society of Chemistry journal article supplement (doi:10.1039/d2cc03861g), 2022-01-01
Supplement: d2cc03861g1.pdf [file d2cc03861g1.pdf]

# Electronic Supplementary Information (ESI)

## **An all-aqueous and phosphine-free integrated amine-assisted CO<sub>2</sub> capture and catalytic conversion to formic acid**

Ritu Bhardwaj, Abhishek Kumar and Joyanta Choudhury\*

Organometallics & Smart Materials Laboratory, Department of Chemistry, Indian Institute of Science Education and Research Bhopal, Bhopal 462066, India. E-mail: [joyanta@iiserb.ac.in](mailto:joyanta@iiserb.ac.in)

---

### Contents

|                                                                                                                                                                            |     |
|----------------------------------------------------------------------------------------------------------------------------------------------------------------------------|-----|
| I. Materials and methods.....                                                                                                                                              | S2  |
| II. CO <sub>2</sub> capture by various amine solutions .....                                                                                                               | S2  |
| III. Hydrogenation of captured CO <sub>2</sub> to formate .....                                                                                                            | S6  |
| IV. In-situ capture and conversion of CO <sub>2</sub> to formate .....                                                                                                     | S13 |
| V. CO <sub>2</sub> capture from atmospheric air and catalytic conversion to formate .....                                                                                  | S15 |
| VI. Characterization of catalyst and amine-adduct after the completion of the catalytic hydrogenation reaction (as described in Section III, using TMG as the amine) ..... | S17 |
| VII. An amine-free high-pressure CO <sub>2</sub> hydrogenation reaction .....                                                                                              | S19 |
| VIII. Plausible catalytic reaction mechanism .....                                                                                                                         | S20 |

## I. Materials and methods

$^1\text{H}$  and  $^{13}\text{C}\{^1\text{H}\}$  NMR spectra were recorded on Bruker AVANCE III 400 500 and 700 MHz NMR spectrometers at 25 °C unless mentioned otherwise. Chemical shifts ( $\delta$ ) are expressed in ppm using the residual proton resonance of the solvent as an internal reference as applicable  $\text{D}_2\text{O}$ :  $\delta = 4.79$  ppm for  $^1\text{H}$  spectra;  $\text{CD}_3\text{CN}$ : 1.94 ppm for  $^1\text{H}$  spectra.  $\text{CO}_2$  (purity 99.999%) and  $\text{H}_2$  (purity 99.999%) gases were purchased from INOX Air Products Pvt. Ltd.  $[\text{Ir}]^{\text{imd}}$  was synthesized following a procedure reported earlier by our group. PEHA, TMG, DBU, DABCO, L-Lysine, MEA and PMDTA were purchased from commercial suppliers and used without further purification. Analytical grade THF, >99.9%, standard was obtained from Sigma Aldrich. Deuterated solvents were purchased from CIL (Cambridge Isotope Laboratory).

## II. $\text{CO}_2$ capture by various amine solutions

In a 25 ml round-bottom flask, 1g amine was dissolved in 3 ml water. A  $\text{CO}_2$  filled balloon was sequestered to the round-bottom flask using a take-off. The aqueous amine solution was stirred for 1 hour at room temperature. The amount of  $\text{CO}_2$  captured was analysed by gravimetry.

### 1. PEHA with $\text{CO}_2$ in water

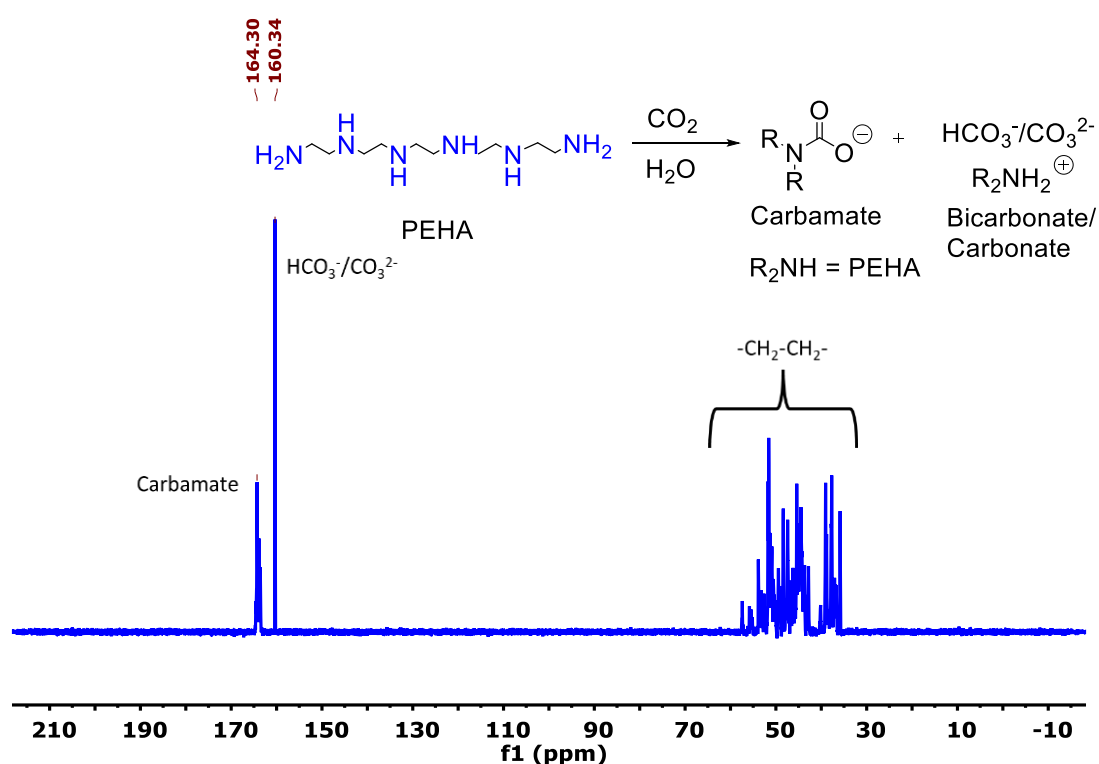

Figure. S1.  $^{13}\text{C}\{^1\text{H}\}$  NMR spectrum of PEHA- $\text{CO}_2$ - $\text{H}_2\text{O}$  in  $\text{D}_2\text{O}$ .

## 2. TMG with CO<sub>2</sub> in water

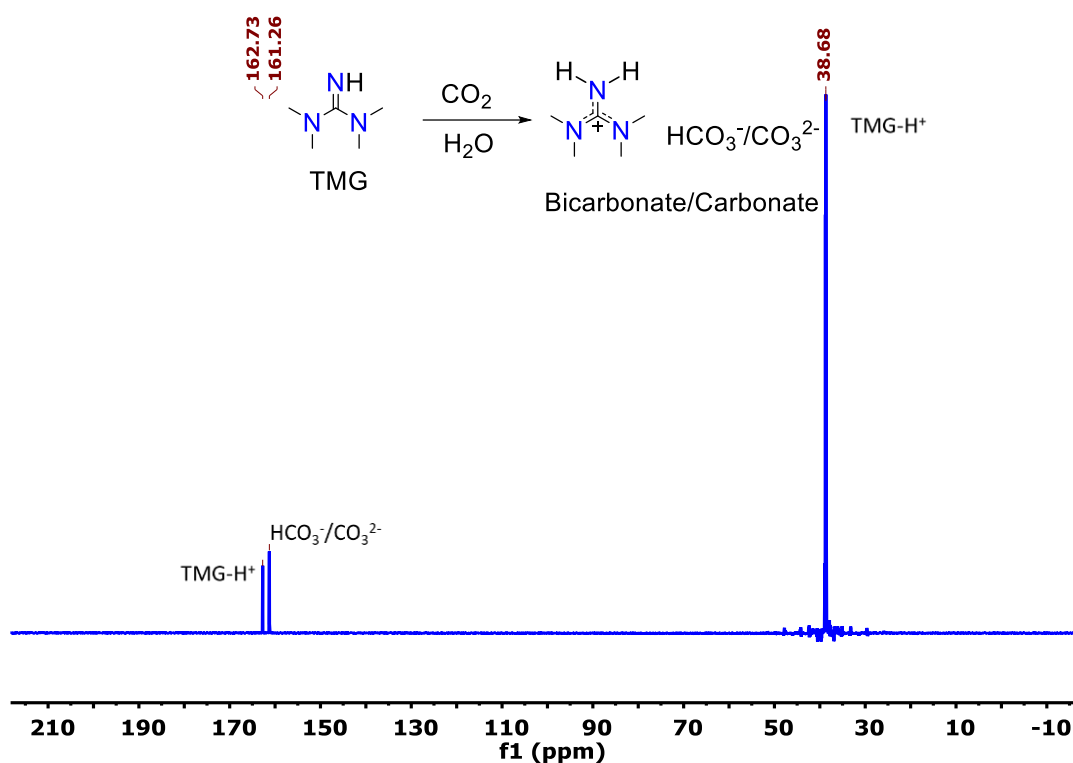

Figure. S2. <sup>13</sup>C{<sup>1</sup>H} NMR spectrum of TMG-CO<sub>2</sub>-H<sub>2</sub>O in D<sub>2</sub>O.

## 3. MEA with CO<sub>2</sub> in water

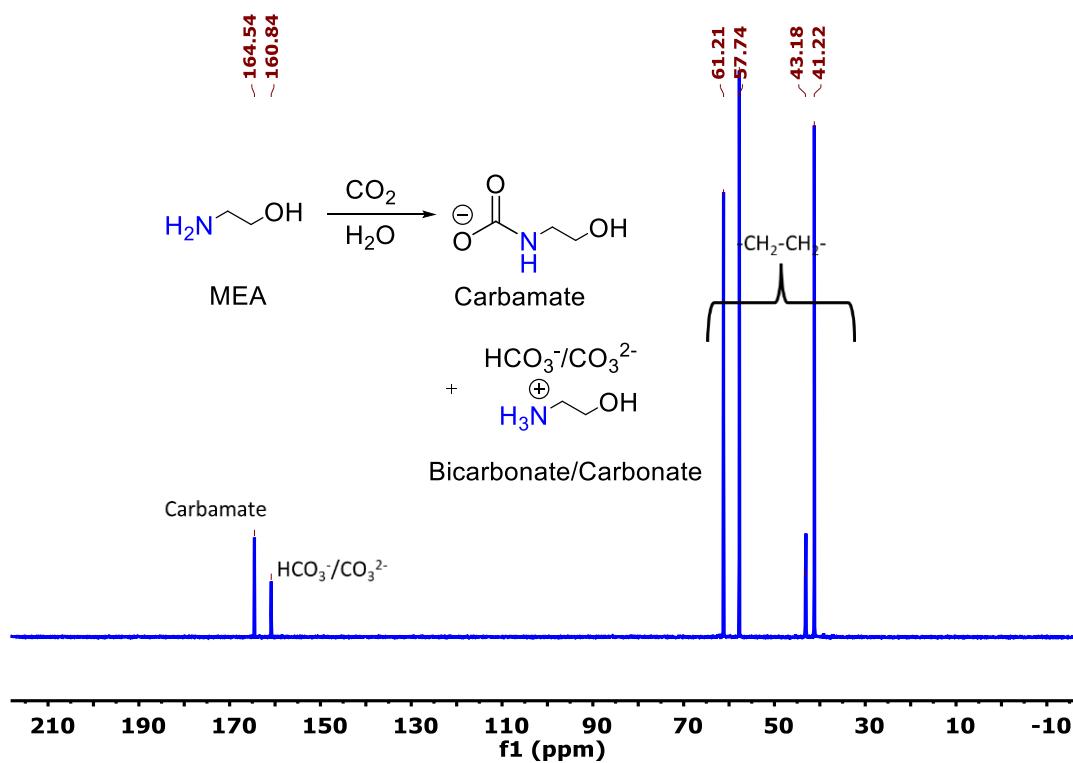

Figure. S3. <sup>13</sup>C{<sup>1</sup>H} NMR spectrum of MEA-CO<sub>2</sub>-H<sub>2</sub>O in D<sub>2</sub>O.

#### 4. L-Lysine with CO<sub>2</sub> in water

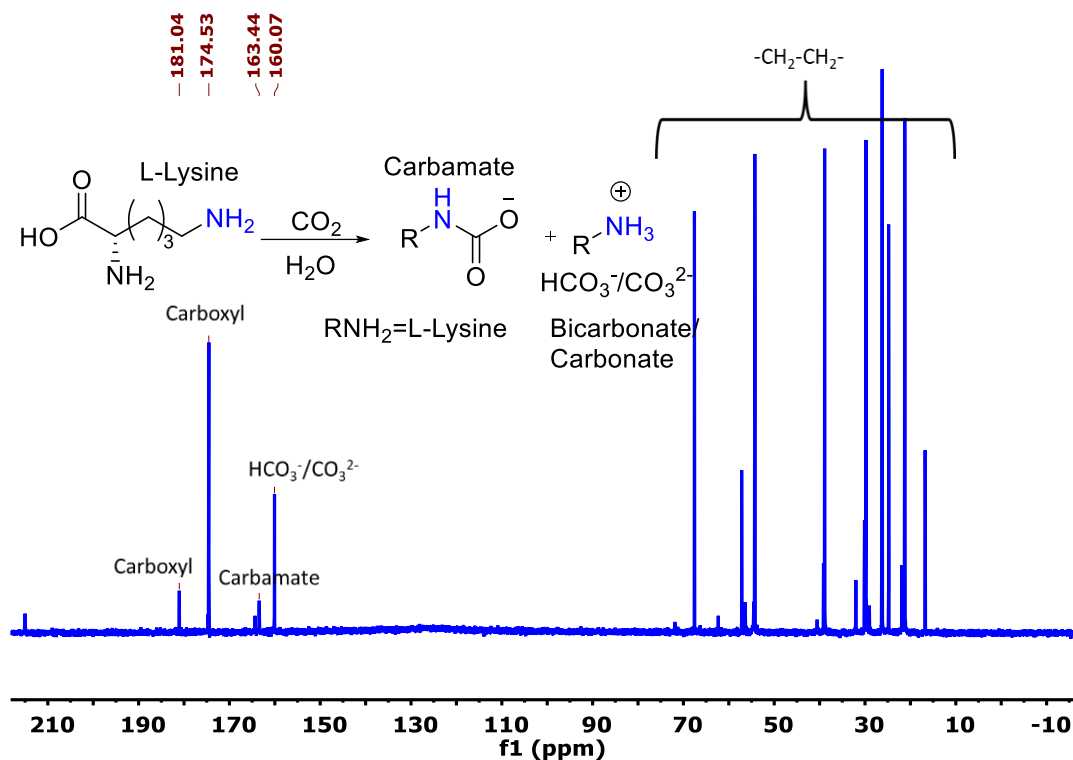

Figure. S4. <sup>13</sup>C{<sup>1</sup>H} NMR spectrum of L-lysine-CO<sub>2</sub>-H<sub>2</sub>O in D<sub>2</sub>O.

#### 5. DBU with CO<sub>2</sub> in water

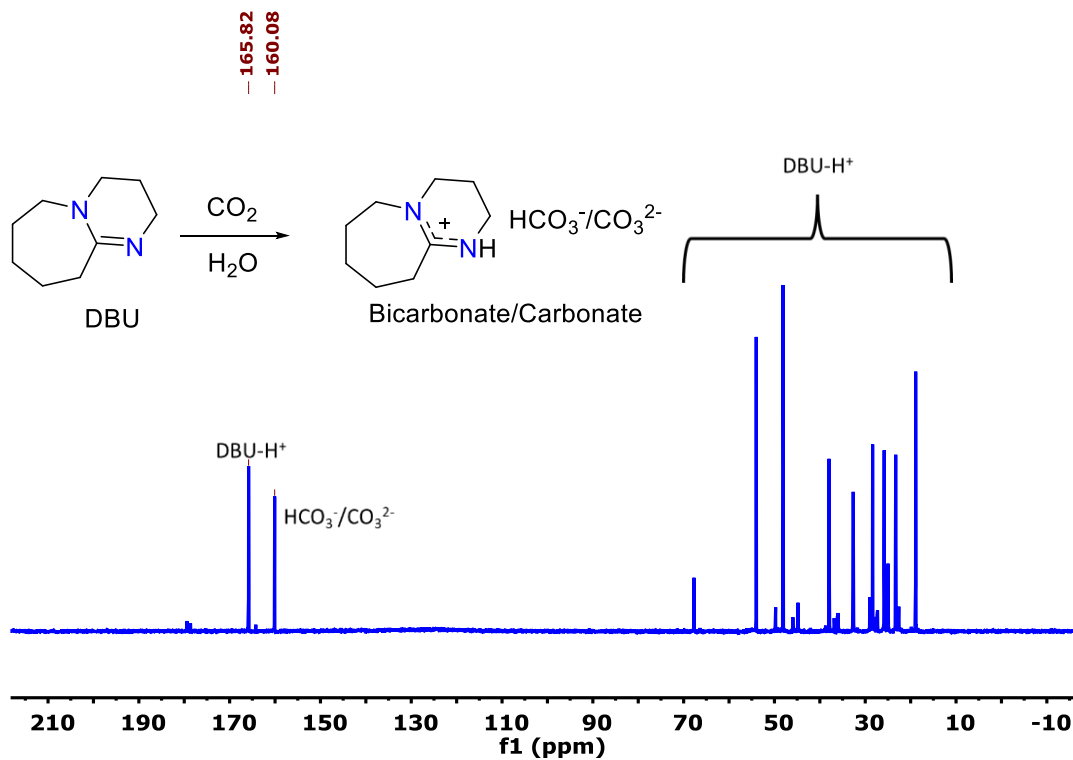

Figure. S5. <sup>13</sup>C{<sup>1</sup>H} NMR spectrum of DBU-CO<sub>2</sub>-H<sub>2</sub>O in D<sub>2</sub>O.

## 6. DABCO with CO<sub>2</sub> in water

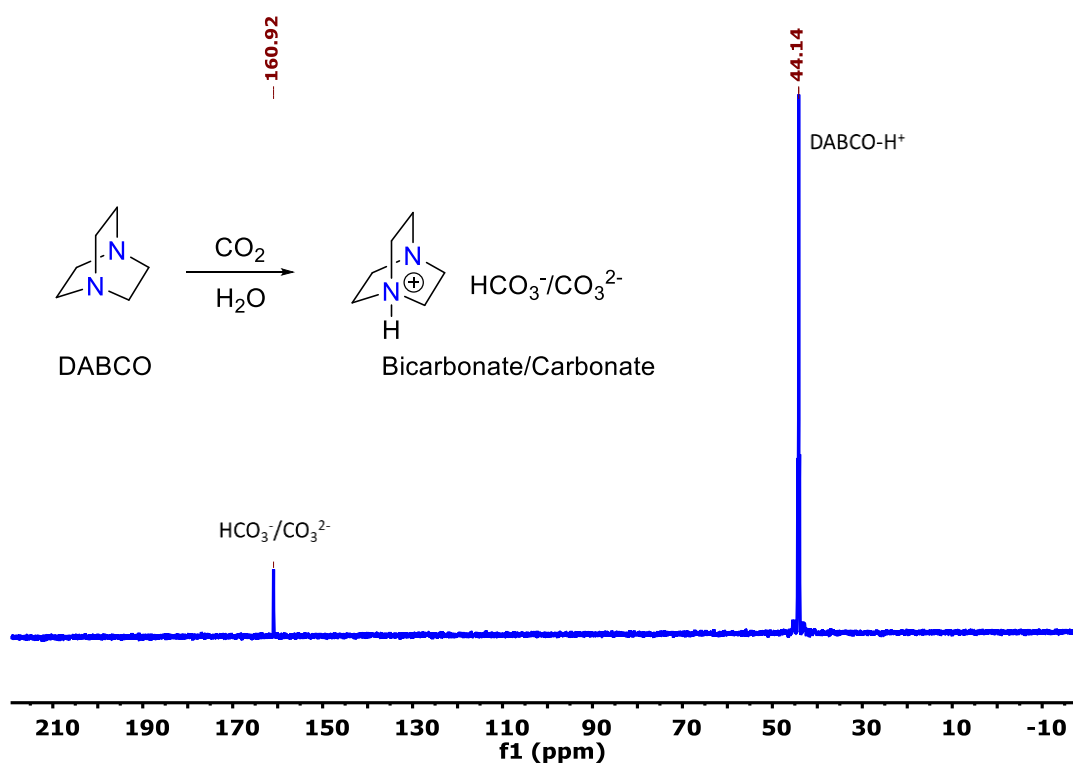

Figure. S6. <sup>13</sup>C{<sup>1</sup>H} NMR spectrum of DABCO-CO<sub>2</sub>-H<sub>2</sub>O in D<sub>2</sub>O.

## 7. PMDTA with CO<sub>2</sub> in water

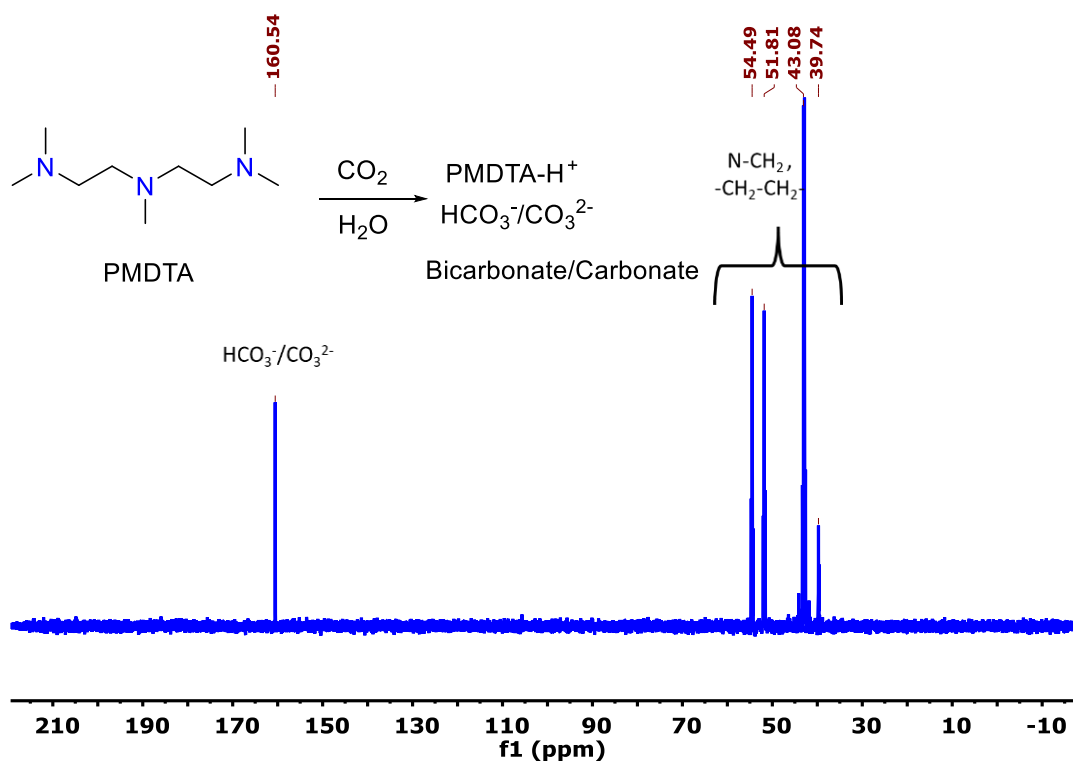

Figure. S7. <sup>13</sup>C{<sup>1</sup>H} NMR spectrum of PMDTA-CO<sub>2</sub>-H<sub>2</sub>O in D<sub>2</sub>O.

### III. Hydrogenation of captured CO<sub>2</sub> to formate

Upon completion of CO<sub>2</sub> capture in aqueous amine solutions, the solutions were subjected to hydrogenation. The CO<sub>2</sub> loaded solution, catalyst [Ir]<sup>imd</sup> and water were added to the 25 ml pressure reactor. The reactor was then pressurized to the desired H<sub>2</sub> pressure (50 bar) and stirred at 120 °C for the desired reaction time. The reactor was then cooled to room temperature. The reaction vessel was then opened and a known amount of internal standard imidazole was added. The reaction mixture was then analysed by <sup>1</sup>H and <sup>13</sup>C NMR spectroscopy using D<sub>2</sub>O as the deuterated solvent. Yield of product was determined by <sup>1</sup>H NMR spectroscopy.

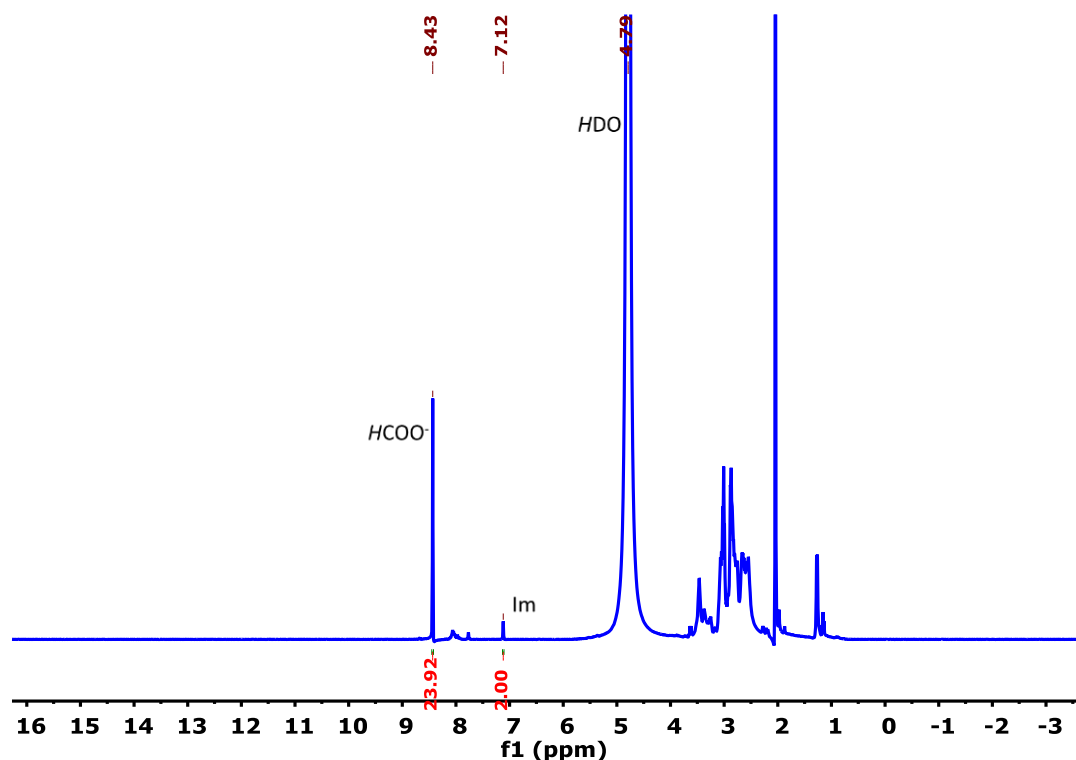

**Figure S8.** <sup>1</sup>H NMR spectrum of the reaction mixture obtained after the hydrogenation of CO<sub>2</sub> captured product from PEHA in D<sub>2</sub>O. Imidazole added as internal standard.

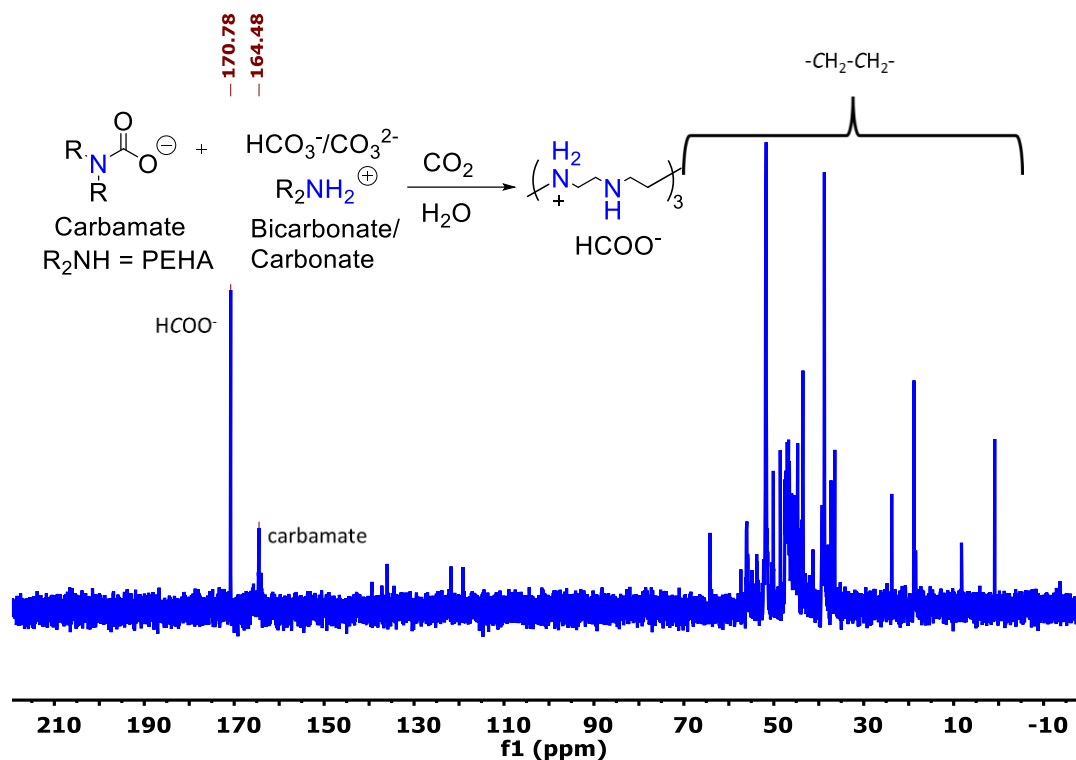

**Figure. S9.**  $^{13}\text{C}\{^1\text{H}\}$  NMR spectrum of the reaction mixture obtained after the hydrogenation of CO<sub>2</sub> captured product from PEHA in D<sub>2</sub>O.

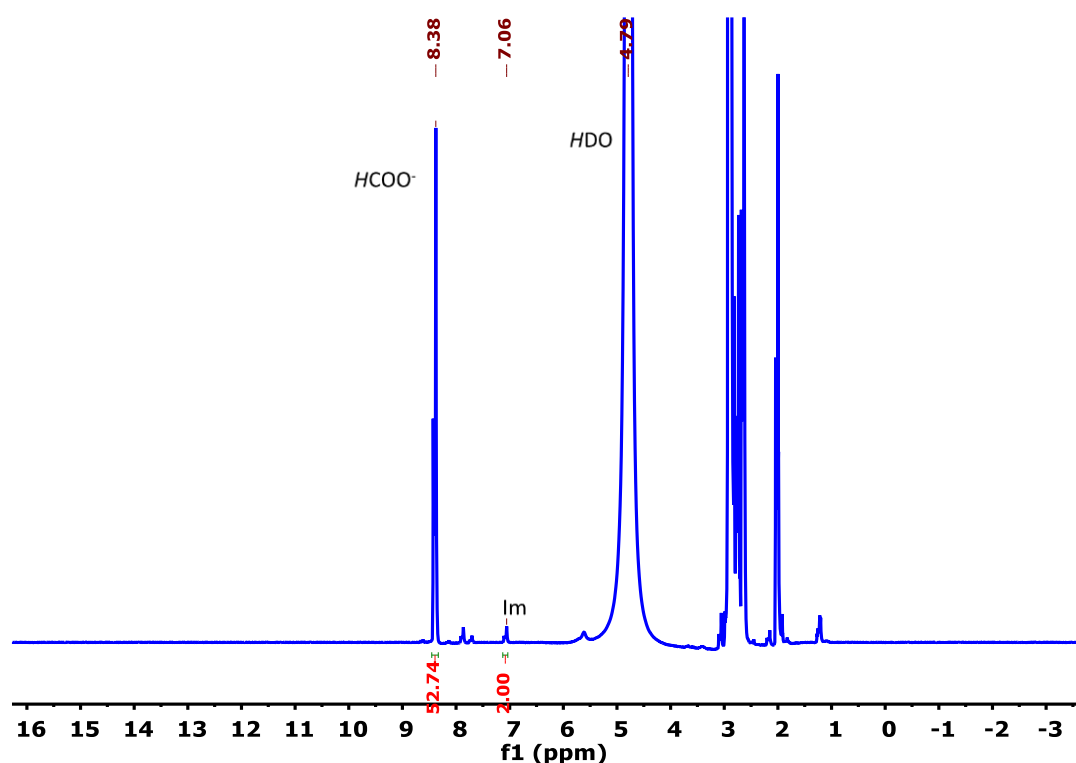

**Figure. S10.**  $^1\text{H}$  NMR spectrum of the reaction mixture obtained after the hydrogenation of CO<sub>2</sub> captured product from TMG in D<sub>2</sub>O. Imidazole added as internal standard.

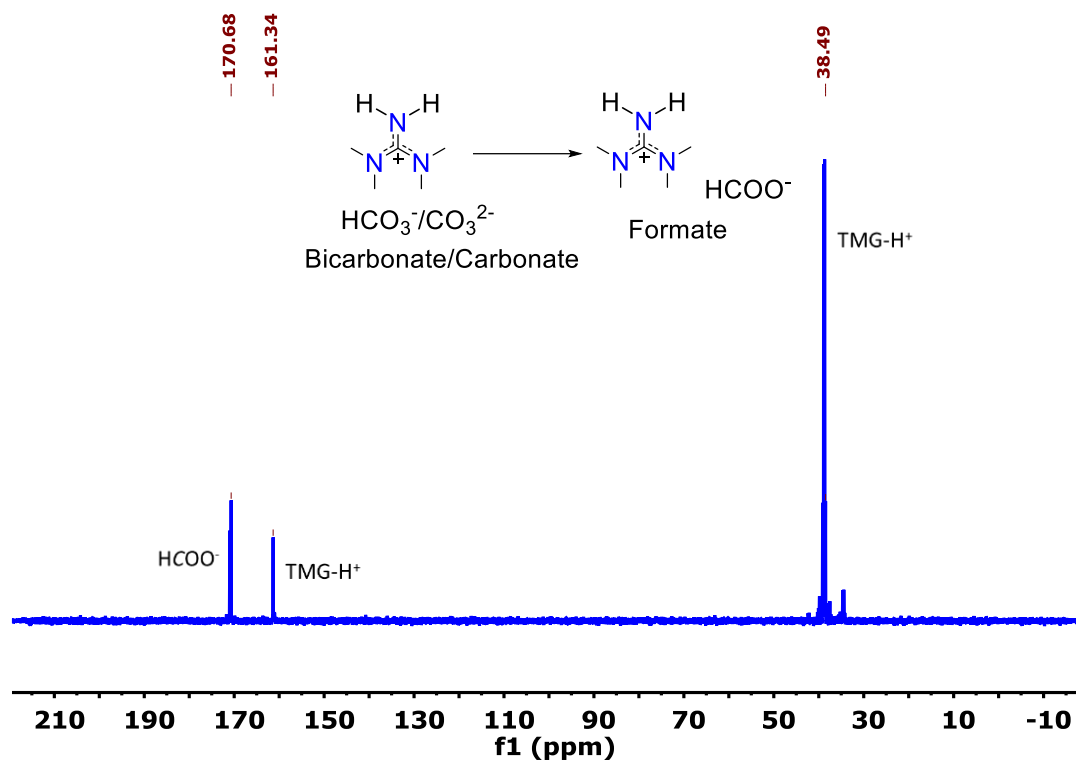

**Figure. S11.**  $^{13}\text{C}\{^1\text{H}\}$  NMR spectrum of the reaction mixture obtained after the hydrogenation of  $\text{CO}_2$  captured product from TMG in  $\text{D}_2\text{O}$ .

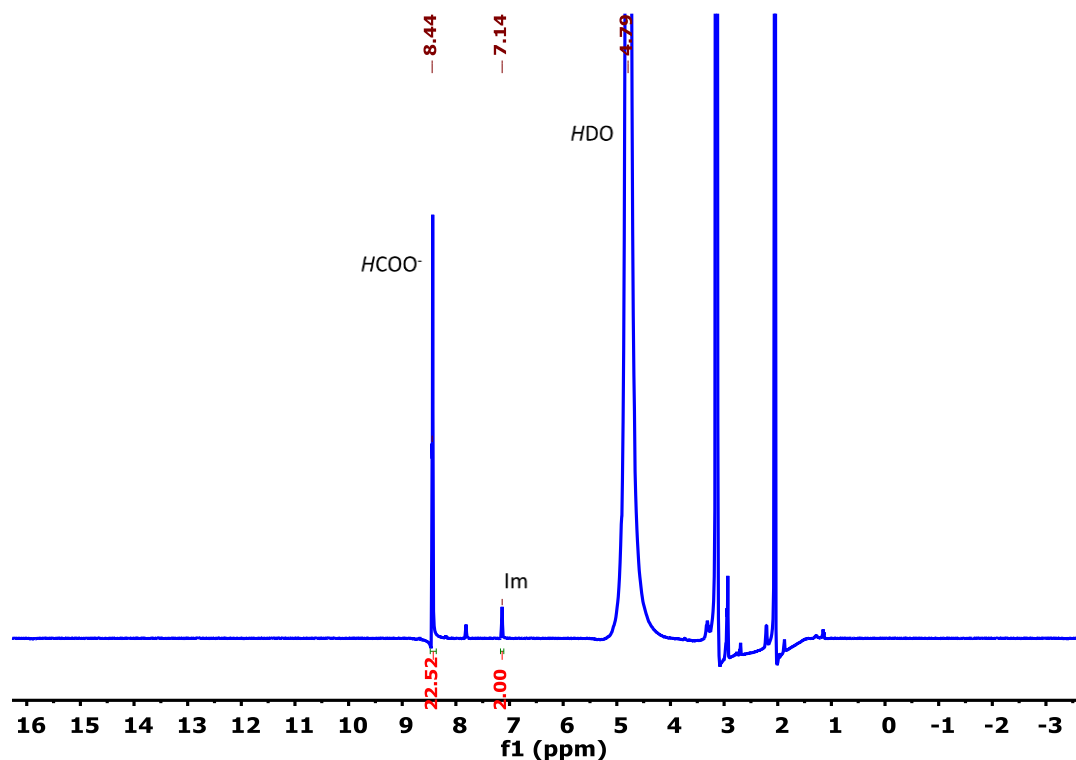

**Figure. S12.**  $^1\text{H}$  NMR spectrum of the reaction mixture obtained after the hydrogenation of  $\text{CO}_2$  captured product from DABCO in  $\text{D}_2\text{O}$ . Imidazole added as internal standard.



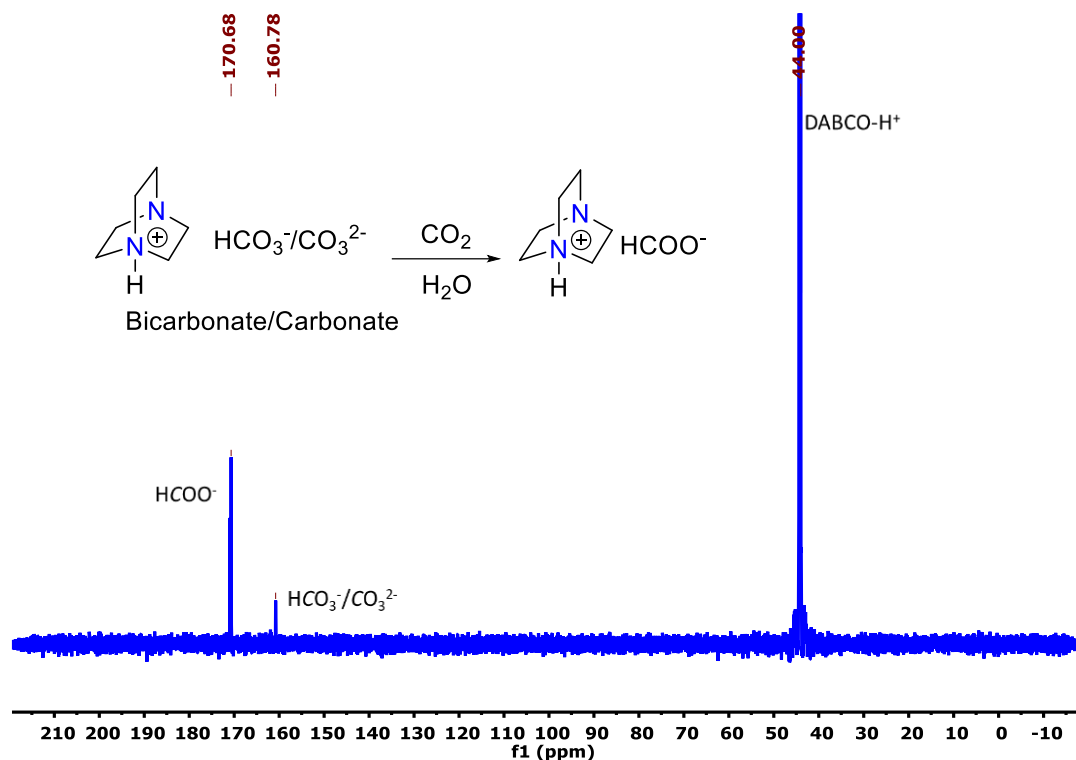

**Figure. S13.**  $^{13}\text{C}\{^1\text{H}\}$  NMR spectrum of the reaction mixture obtained after the hydrogenation of  $\text{CO}_2$  captured product from DABCO in  $\text{D}_2\text{O}$ .

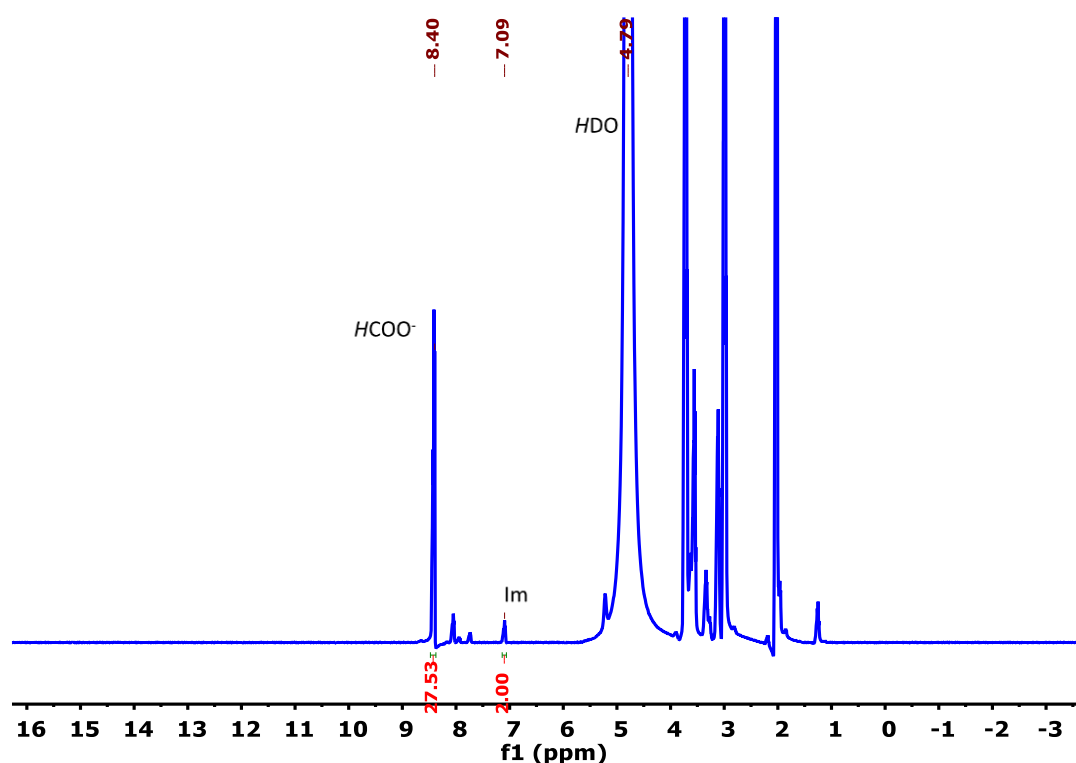

**Figure. S14.**  $^1\text{H}$  NMR spectrum of the reaction mixture obtained after the hydrogenation of  $\text{CO}_2$  captured product from MEA in  $\text{D}_2\text{O}$ . Imidazole added as internal standard.

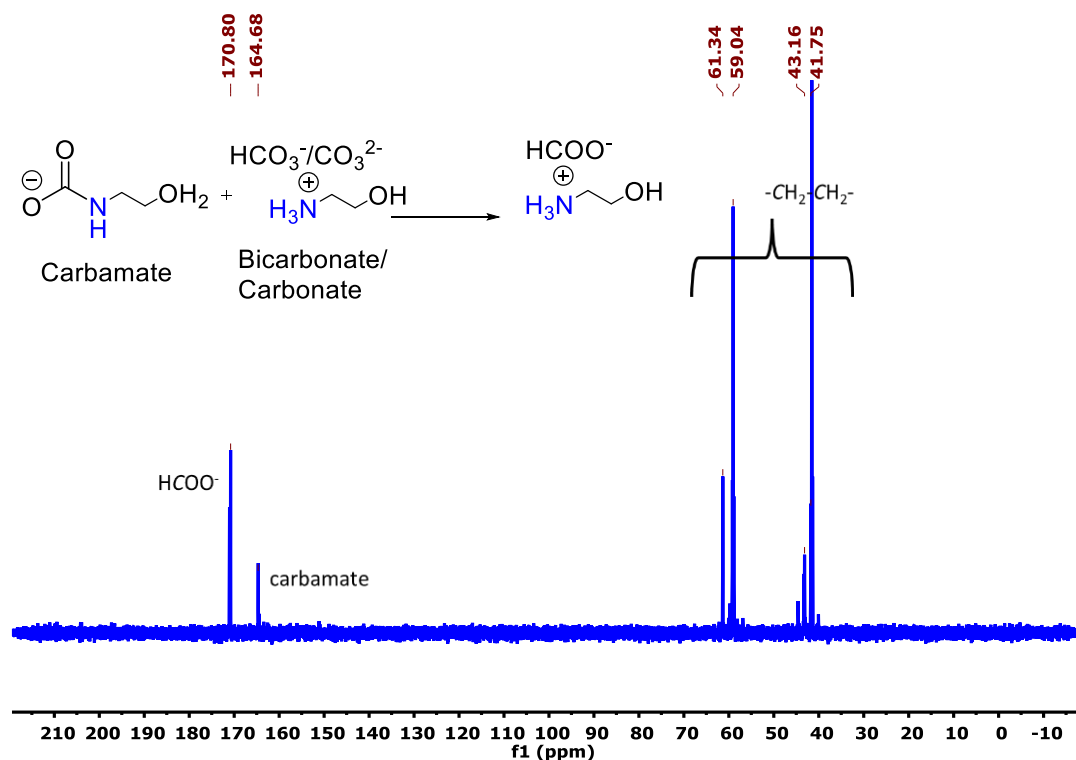

**Figure. S15.** <sup>13</sup>C{<sup>1</sup>H} NMR spectrum of the reaction mixture obtained after the hydrogenation of CO<sub>2</sub> captured product from MEA in D<sub>2</sub>O.

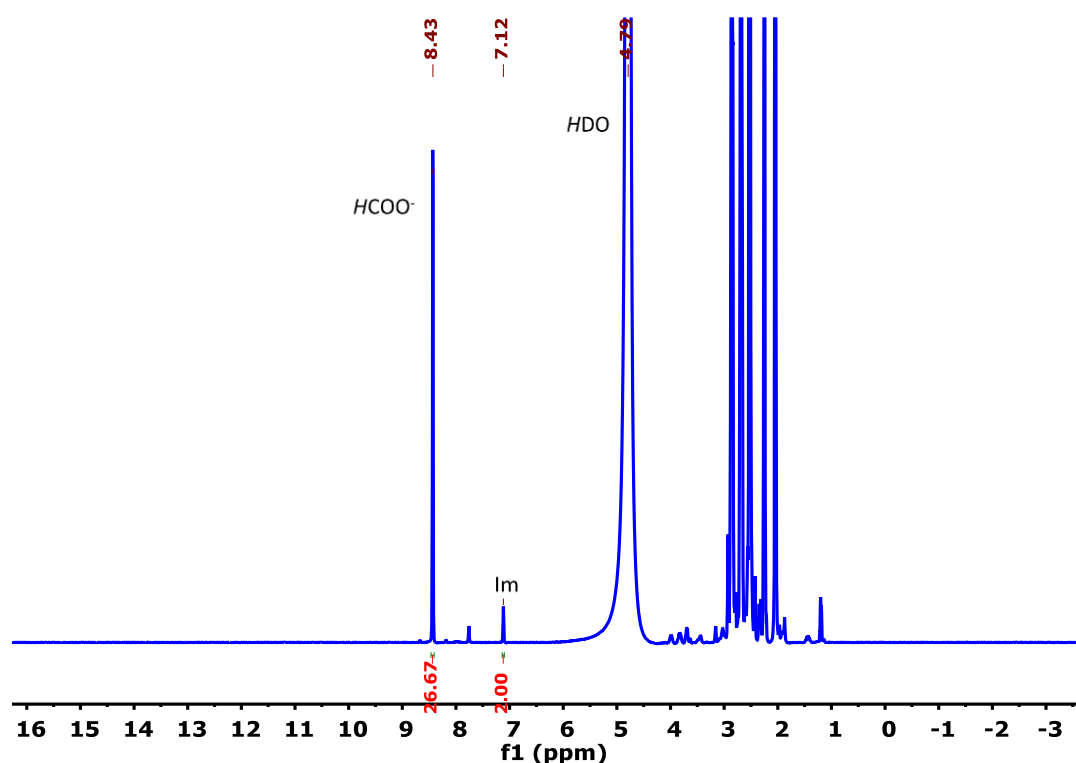

**Figure. S16.** <sup>1</sup>H NMR spectrum of the reaction mixture obtained after the hydrogenation of CO<sub>2</sub> captured product from PMDTA in D<sub>2</sub>O. Imidazole added as internal standard.

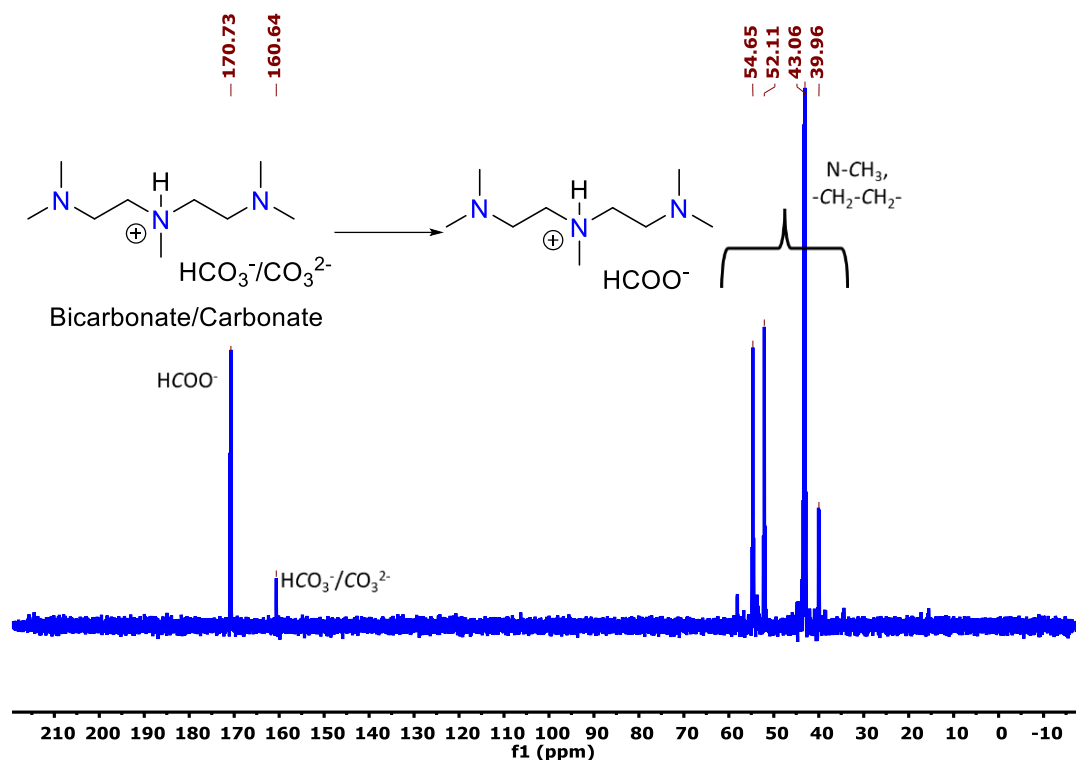

**Figure. S17.**  $^{13}\text{C}\{^1\text{H}\}$  NMR spectrum of the reaction mixture obtained after the hydrogenation of  $\text{CO}_2$  captured product from PMDTA in  $\text{D}_2\text{O}$ .

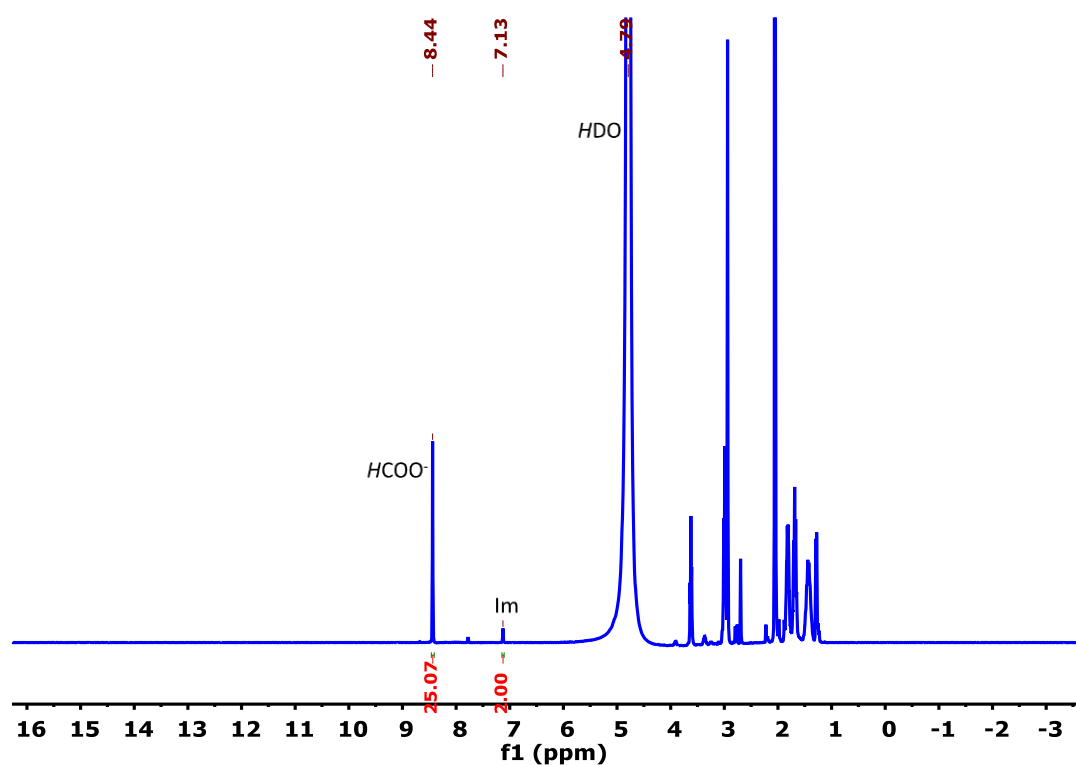

**Figure. S18.**  $^1\text{H}$  NMR spectrum of the reaction mixture obtained after the hydrogenation of  $\text{CO}_2$  captured product from L-Lysine in  $\text{D}_2\text{O}$ . Imidazole added as internal standard.

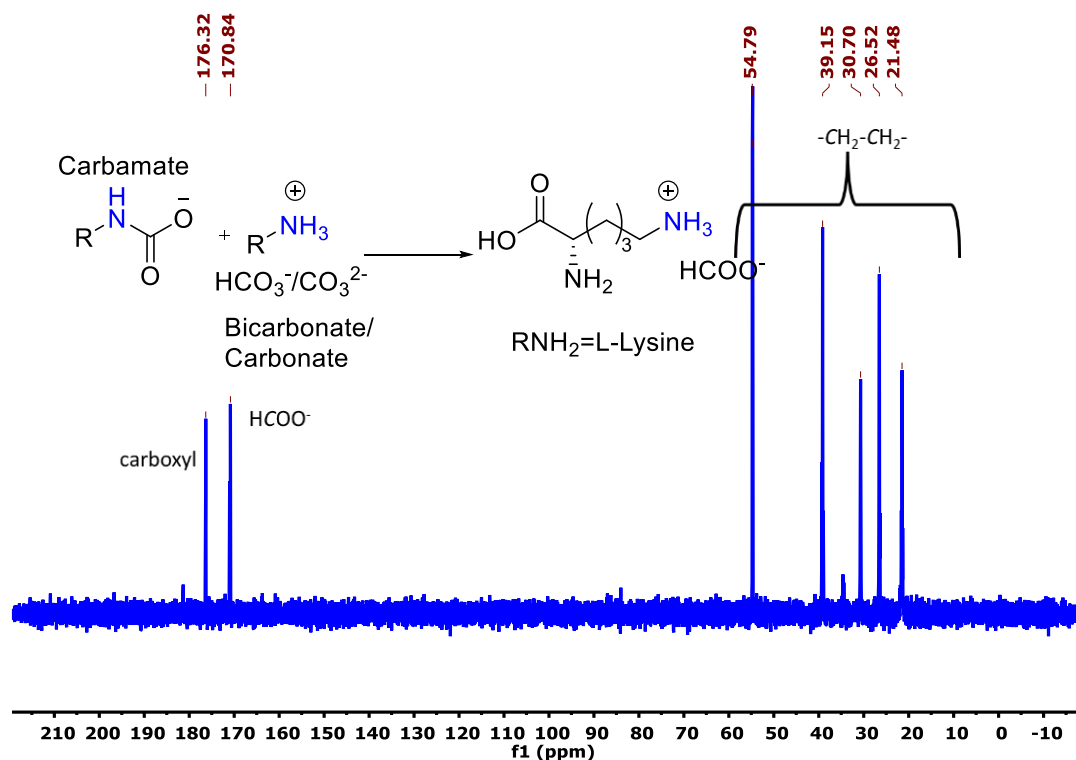

**Figure. S19.**  $^{13}\text{C}\{^1\text{H}\}$  NMR spectrum of the reaction mixture obtained after the hydrogenation of  $\text{CO}_2$  captured product from L-Lysine in  $\text{D}_2\text{O}$ .

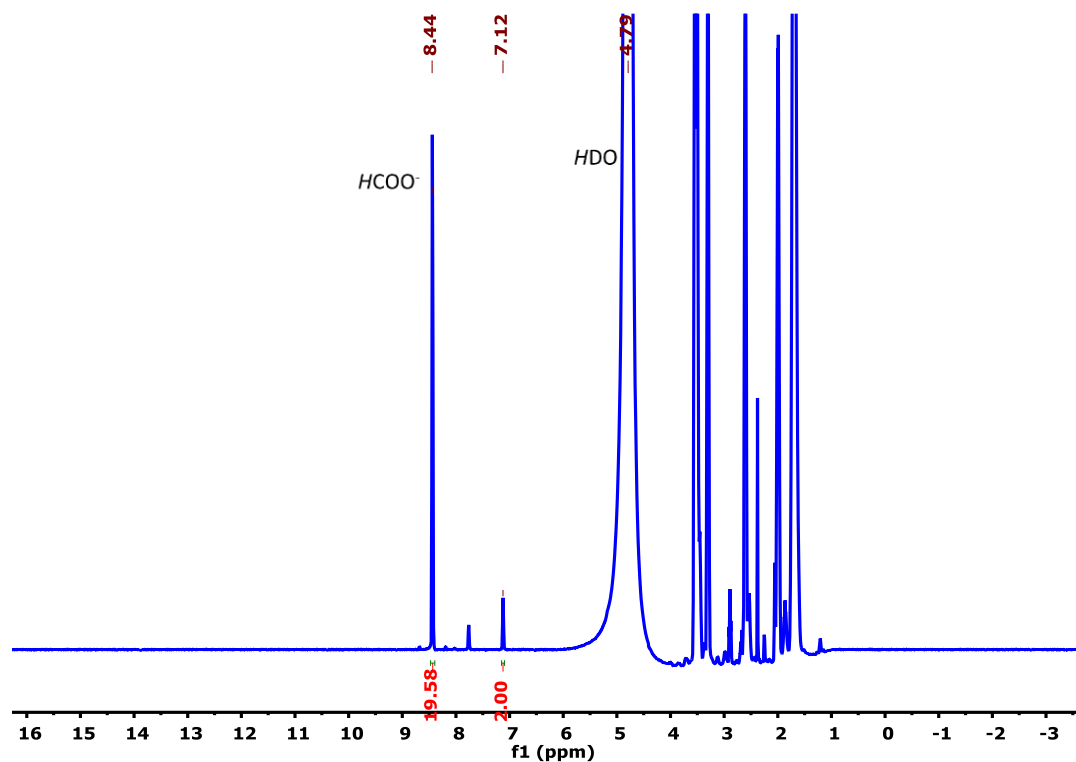

**Figure. S20.**  $^1\text{H}$  NMR spectrum of the reaction mixture obtained after the hydrogenation of  $\text{CO}_2$  captured product from DBU in  $\text{D}_2\text{O}$ . Imidazole added as internal standard.

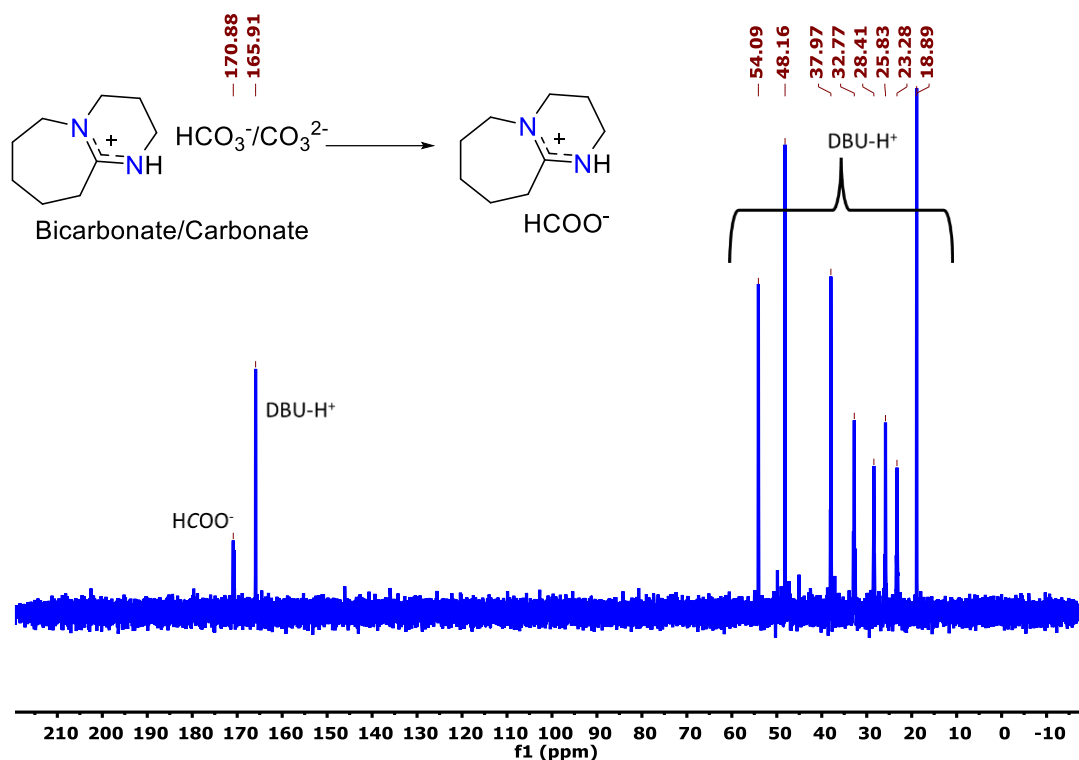

**Figure. S21.** <sup>13</sup>C{<sup>1</sup>H} NMR spectrum of the reaction mixture obtained after the hydrogenation of CO<sub>2</sub> captured product from DBU in D<sub>2</sub>O.

#### IV. In-situ capture and conversion of CO<sub>2</sub> to formate

Catalyst [Ir]<sup>imd</sup>, TMG and water were added to the 25 ml pressure reactor. The reactor was then pressurized to the desired CO<sub>2</sub>/H<sub>2</sub> pressure and stirred at 120 °C for the desired reaction time. The reactor was then cooled to room temperature. The reaction vessel was then opened and a known amount of internal standard imidazole was added. The reaction mixture was then analysed by <sup>1</sup>H and <sup>13</sup>C NMR spectroscopy using D<sub>2</sub>O as the deuterated solvent. Yield of product was determined by <sup>1</sup>H NMR spectroscopy.

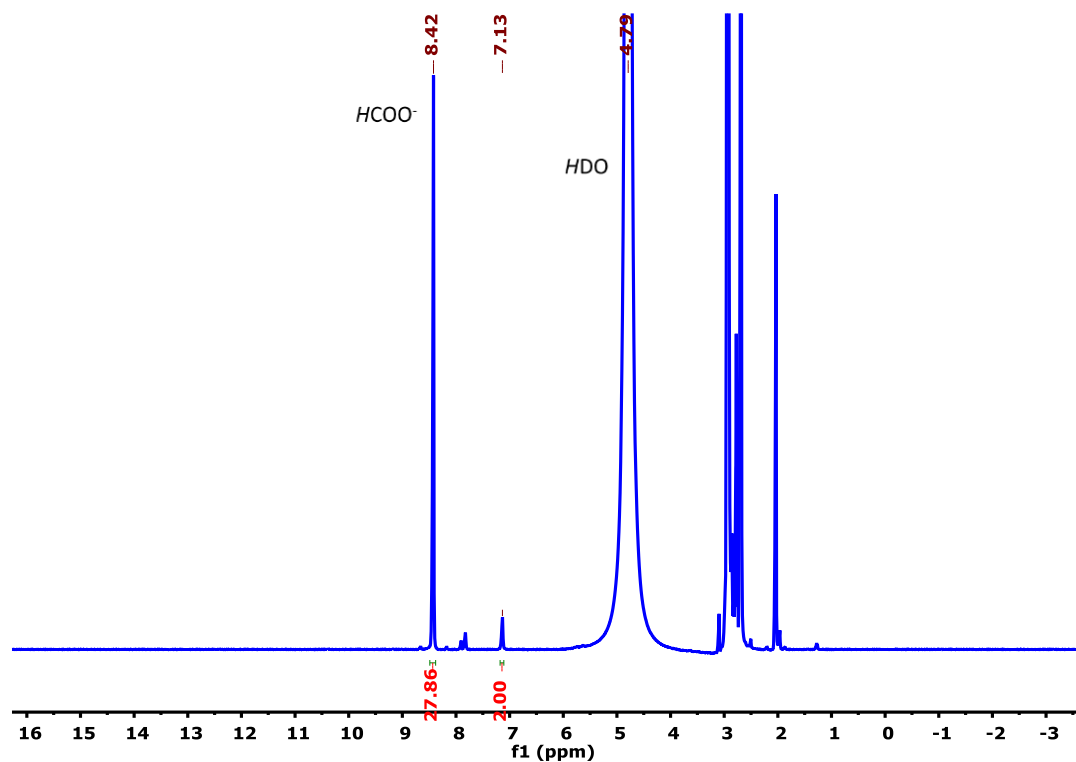

**Figure. S22.**  $^1\text{H}$  NMR spectrum of the reaction mixture obtained after the in-situ hydrogenation of  $\text{CO}_2$  using TMG in  $\text{D}_2\text{O}$ . Imidazole added as internal standard.

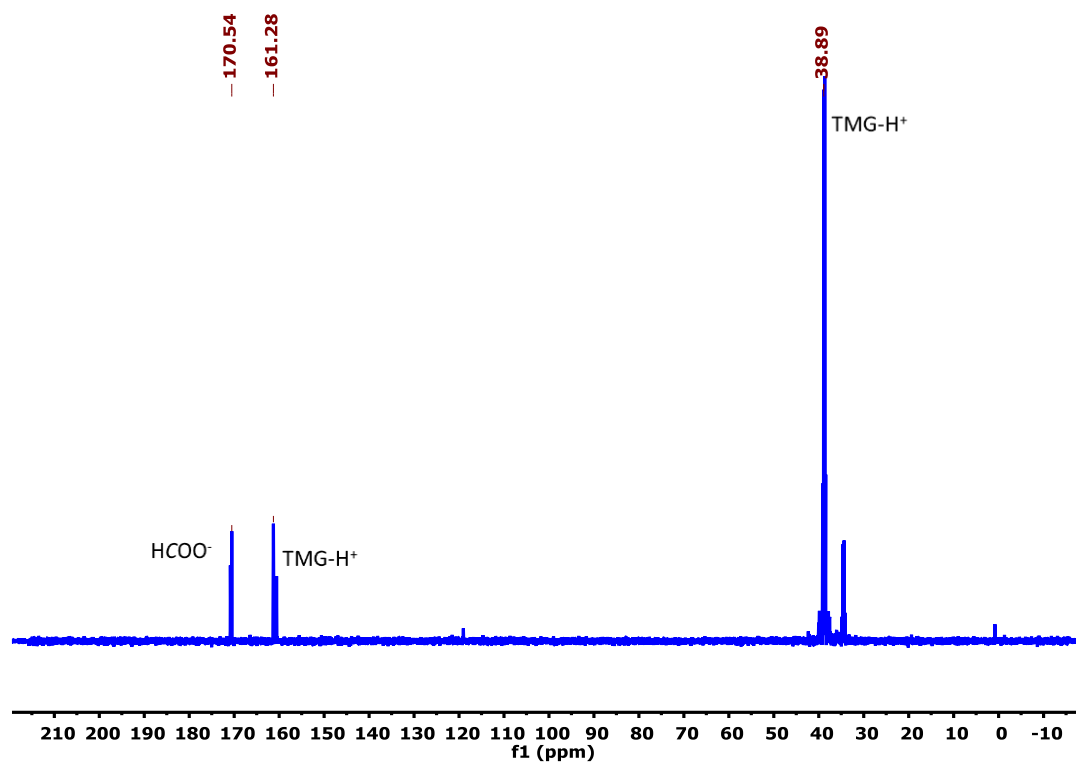

**Figure. S23.**  $^{13}\text{C}\{^1\text{H}\}$  NMR spectrum of the reaction mixture obtained after the in-situ hydrogenation of  $\text{CO}_2$  using TMG in  $\text{D}_2\text{O}$ .

## V. CO<sub>2</sub> capture from atmospheric air and catalytic conversion to formate

TMG (0.9 g, 7.9 mmol) was dissolved in water (8 mL) in a 25 mL Schlenk tube. 50 mL/min of ambient air was bubbled through the Schlenk tube using a needle for 72 h. THF was added as a standard to the solution, and the mixture was analyzed by <sup>13</sup>C NMR with decoupled-NOE, relaxation delay = 25s (rd > 25 s did not change the integration), pulse angle = 45°, scans = 1000 and acquisition time = 1.36 s.

Upon completion of CO<sub>2</sub> capture from air, the solution was subjected to the catalytic hydrogenation protocol. The CO<sub>2</sub> loaded solution, catalyst [Ir]<sup>imd</sup> and water were added to the 25 mL pressure reactor. The reactor was then pressurized to the desired H<sub>2</sub> pressure (50 bar) and stirred at 120 °C for the desired reaction time. The reactor was then cooled to room temperature. The reaction vessel was then opened and a known amount of internal standard imidazole was added. The reaction mixture was then analysed by <sup>1</sup>H and <sup>13</sup>C NMR spectroscopy using D<sub>2</sub>O as the deuterated solvent. Yield of formate product was determined by <sup>1</sup>H NMR spectroscopy.

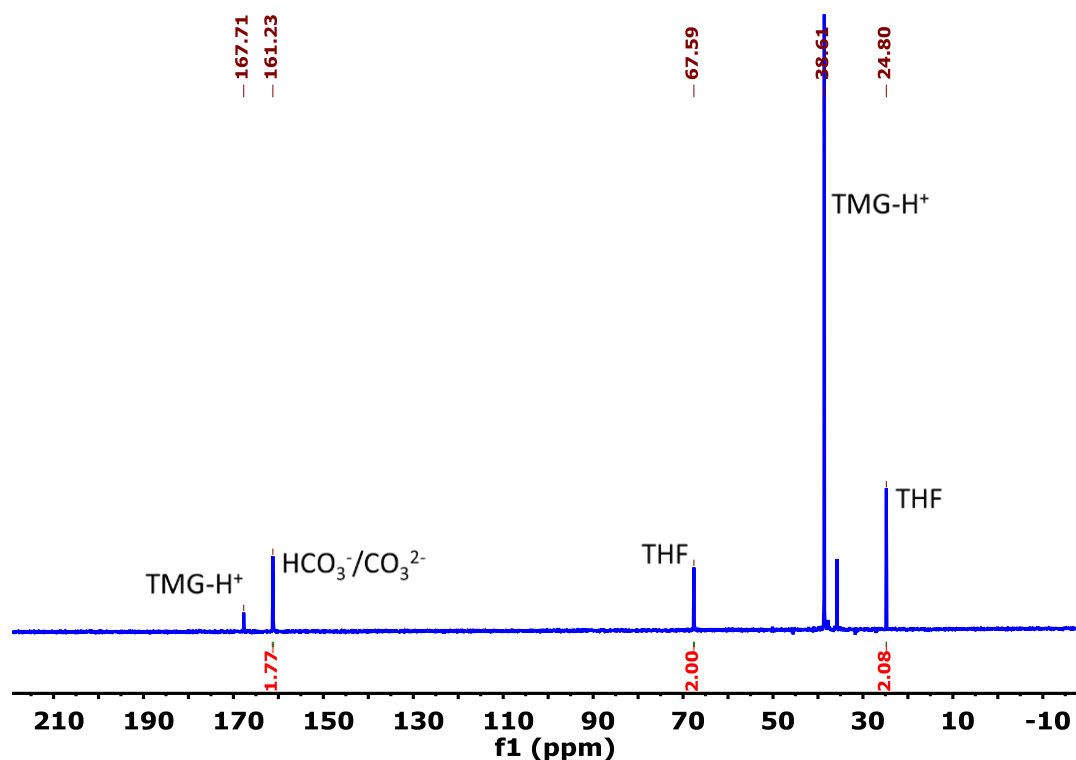

Figure. S24. <sup>13</sup>C{<sup>1</sup>H} NMR spectrum of CO<sub>2</sub> captured from air using aqueous TMG in D<sub>2</sub>O.

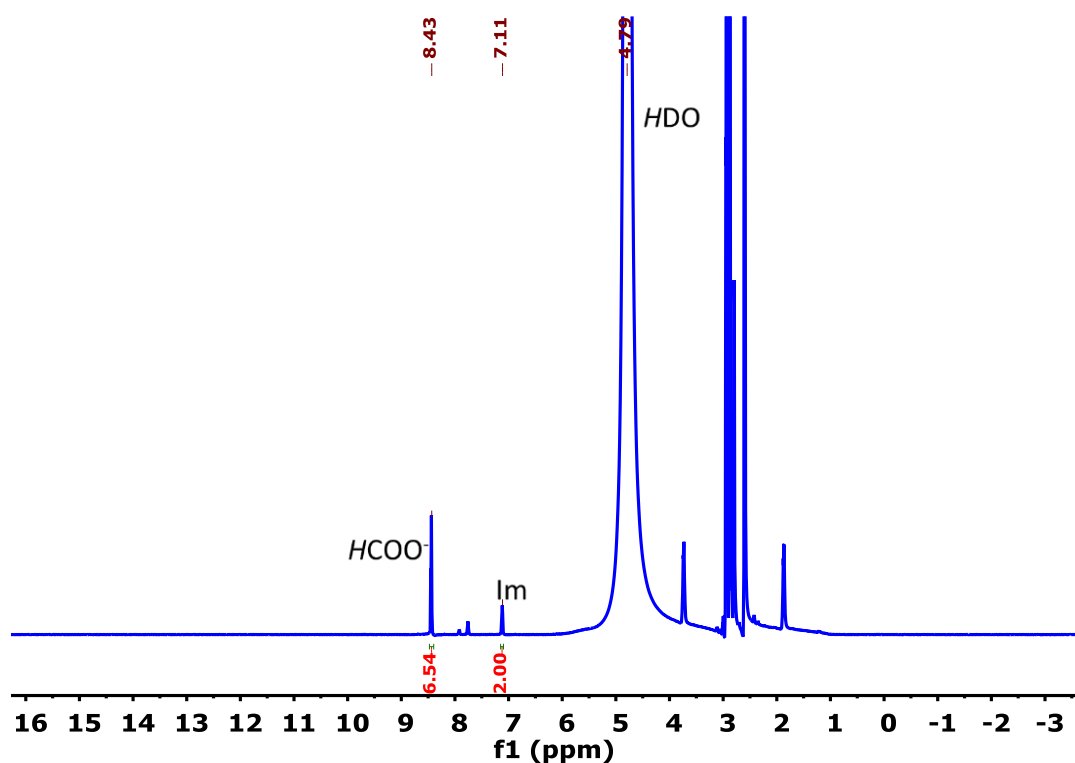

**Figure. S25.**  $^1\text{H}$  NMR spectrum of the reaction mixture obtained after the hydrogenation of  $\text{CO}_2$  captured product from air using TMG in  $\text{D}_2\text{O}$ . Imidazole added as internal standard.

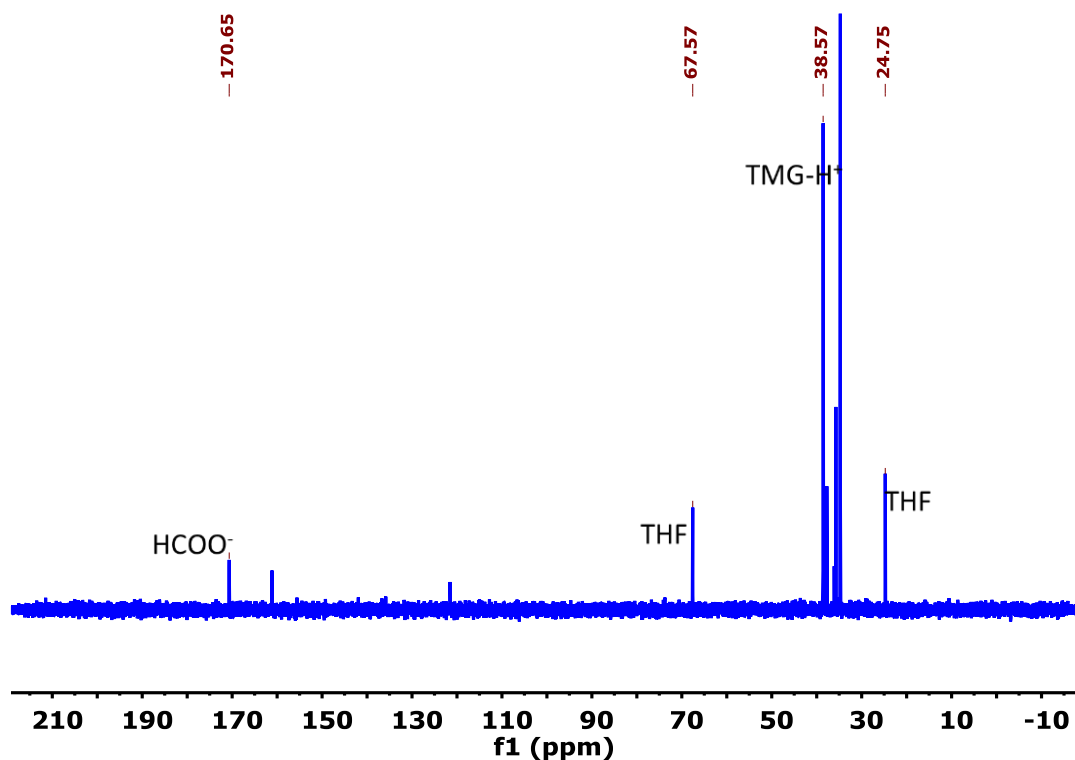

**Figure. S26.**  $^{13}\text{C}\{^1\text{H}\}$  NMR spectrum of the reaction mixture obtained after the hydrogenation of  $\text{CO}_2$  captured product from air using TMG in  $\text{D}_2\text{O}$ .



## VI. Characterization of catalyst and amine-adduct after the completion of the catalytic hydrogenation reaction (as described in Section III, using TMG as the amine)

### 1. Catalyst characterization

Upon completion of the catalytic hydrogenation reaction (as described in Section III, using TMG as the amine), 10 mL dichloromethane (DCM) was added to the aqueous reaction mixture. This was followed by a solvent extraction for the catalyst. The DCM layer was concentrated and subjected to  $^1\text{H}$  NMR spectroscopy and mass spectrometry analysis. The analysis indicated that the catalyst backbone (the bound  $\text{Cp}^*$  and the benzimidazole-NHC ligands) remained intact.

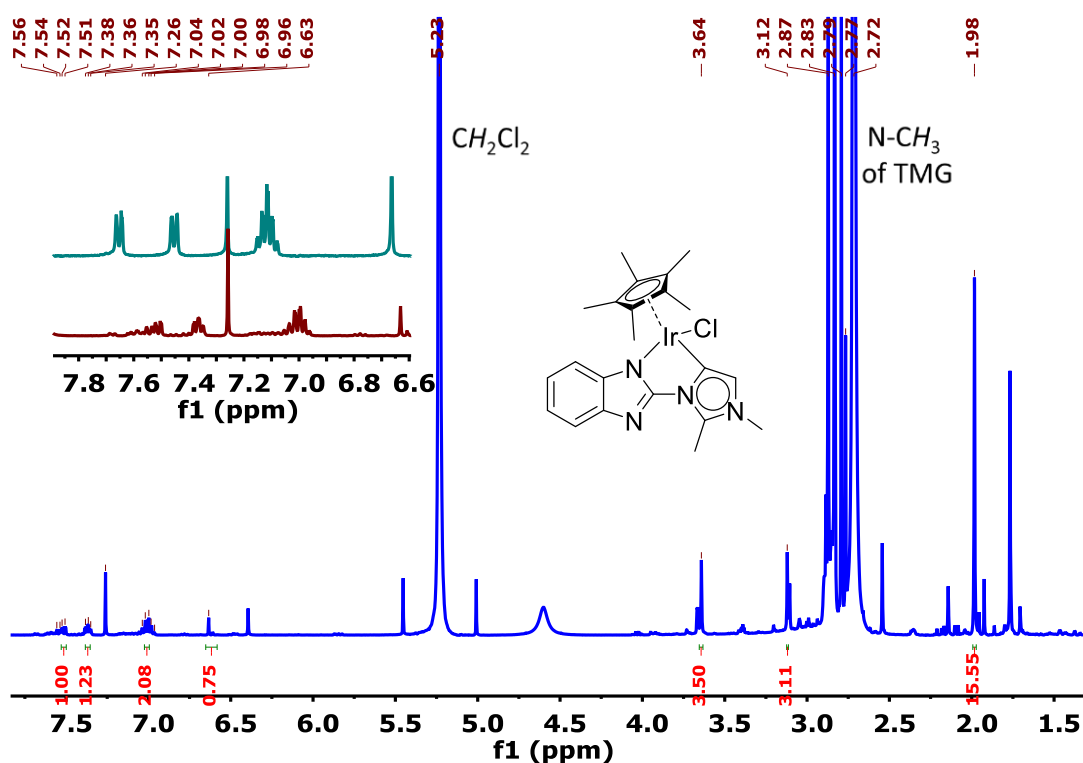

**Figure. S27.**  $^1\text{H}$  NMR spectrum of the catalyst after completion of reaction in  $\text{CDCl}_3$ . The inset shows the comparison of the aromatic region with the original catalyst.

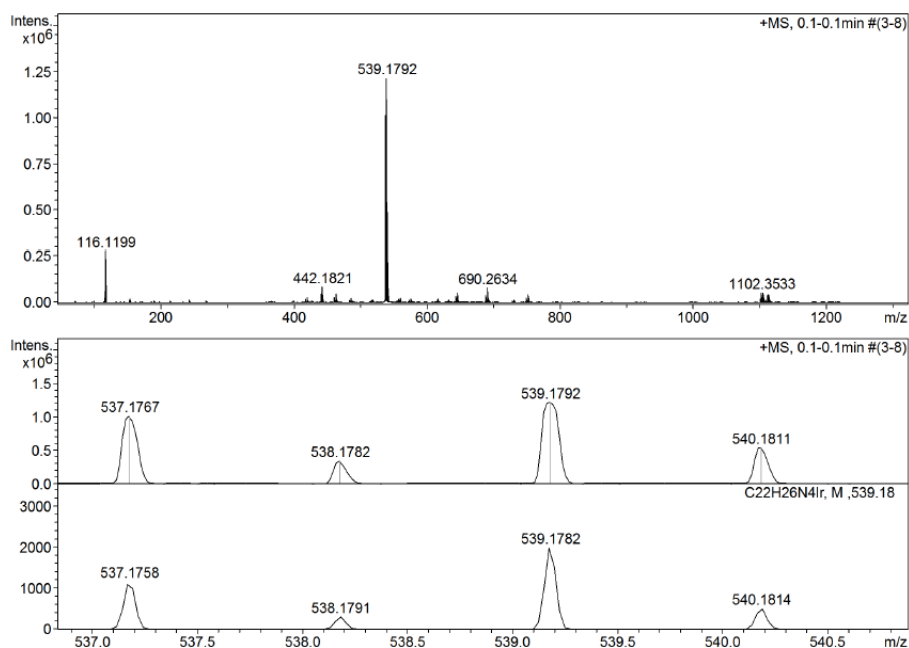

**Figure. S28.** ESI-MS (positive mode) spectrum of the catalyst after the completion of the reaction. HRMS (ESI, positive ion)  $[M-Cl]^+ = 539.1792$  (calcd for  $[C_{22}H_{26}N_4Ir]^+ = 539.1782$ )

## 2. Amine-adduct characterization

The amine base TMG stabilized the formic acid product generated upon completion of the reaction by forming an acid-base adduct. This was confirmed through integration analysis of the corresponding peaks in the  $^1H$  NMR spectrum of the reaction mixture. An authentic equimolar mixture of HCOOH and TMG in water was also subjected to  $^1H$  NMR spectroscopy to support the analysis.

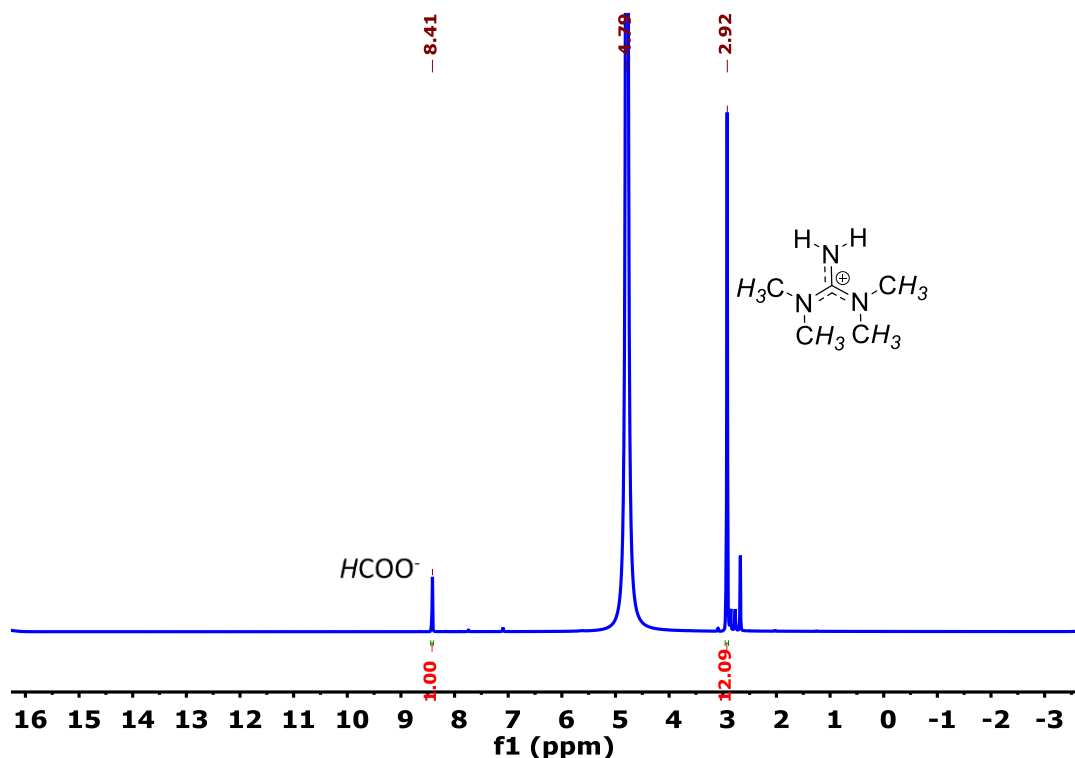

**Figure. S29.**  $^1H$  NMR spectrum of the reaction mixture obtained after the hydrogenation of  $CO_2$  captured product from TMG in  $D_2O$ .

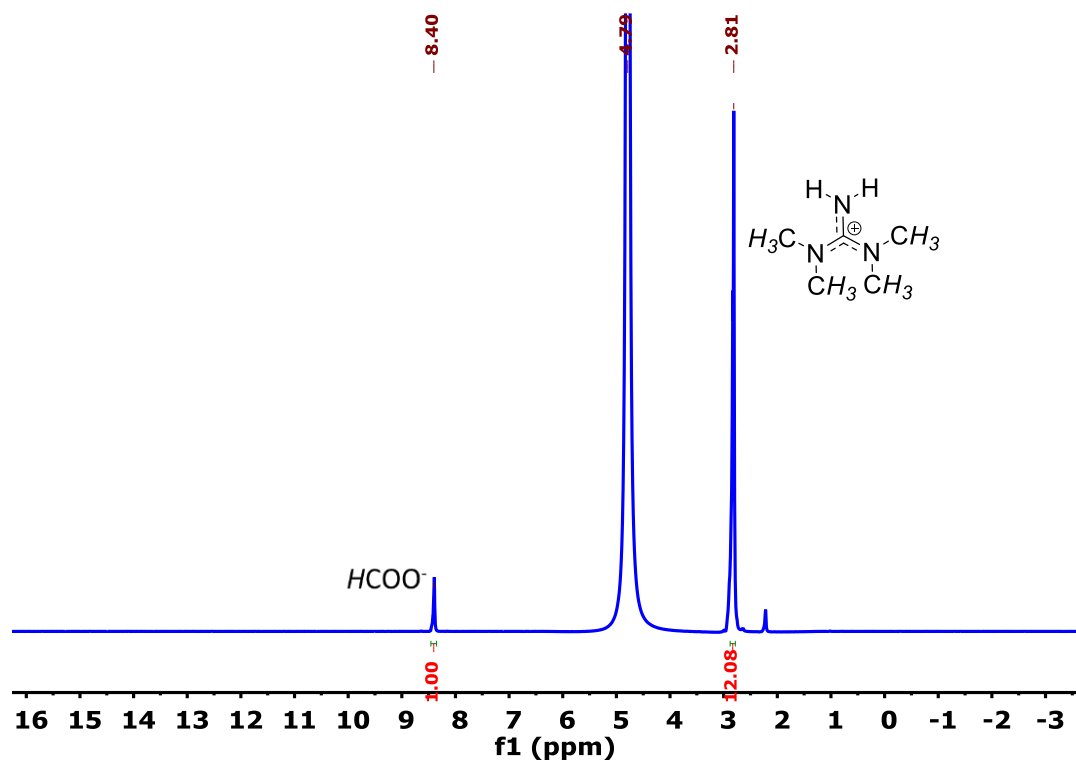

**Figure. S30.**  $^1\text{H}$  NMR spectrum of a sample of authentic equimolar HCOOH and TMG in  $\text{D}_2\text{O}$ .

## VII. An amine-free high-pressure $\text{CO}_2$ hydrogenation reaction

Catalyst  $[\text{Ir}]^{\text{imd}}$  ( $4.3 \mu\text{mol}$ ) and water (10 ml) were added to a 25 mL pressure reactor. The reactor was then pressurized to the desired  $\text{CO}_2/\text{H}_2$  pressure (10 bar  $\text{CO}_2$ : 40 bar  $\text{H}_2$ ) and then the reaction mixture was stirred at  $120 \text{ }^\circ\text{C}$  for 4 h. The reactor was then cooled to room temperature and was opened. A known amount of internal standard imidazole was added. The reaction mixture was then analysed by  $^1\text{H}$  NMR spectroscopy using  $\text{D}_2\text{O}$  as the deuterated solvent. Formation of formate product was not observed.

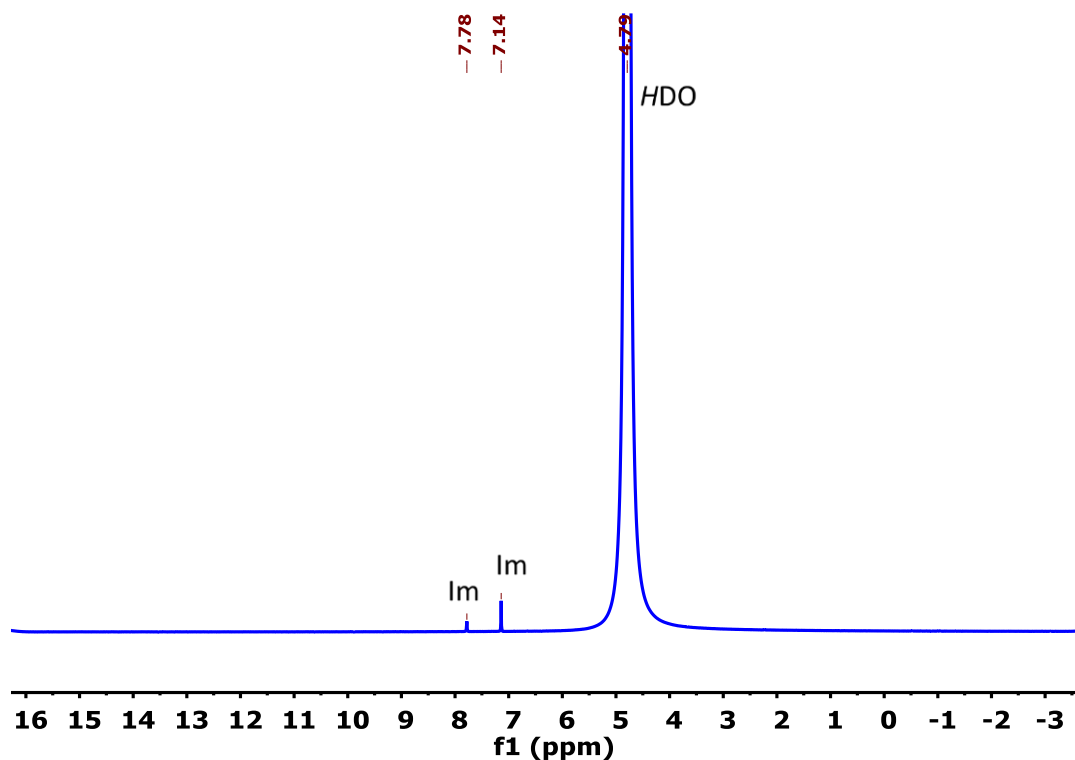

**Figure. S31.**  $^1\text{H}$  NMR spectrum of the reaction mixture obtained after the in-situ hydrogenation of  $\text{CO}_2$  in amine-free conditions in  $\text{D}_2\text{O}$ . Imidazole added as internal standard.

### VIII. Plausible catalytic reaction mechanism

The plausible catalytic cycle for the present  $\text{CO}_2$ -hydrogenation reaction is proposed (Fig. S32). After the halide dissociation from the catalyst  $[\text{Ir}]^{\text{imd}}$  in water, the active species cleaves  $\text{H}_2$  to generate  $\text{Ir-H}$  under the basic conditions (amine-water system). The proton (from  $\text{H}_2$ ) might be abstracted by the basic medium. The  $\text{Ir-H}$  species then delivers its hydride ligand to the substrate present in the reaction mixture, to produce  $\text{Ir-formato}$  species, which dissociates formate stabilized as the amine-adduct and regenerates the active catalyst.

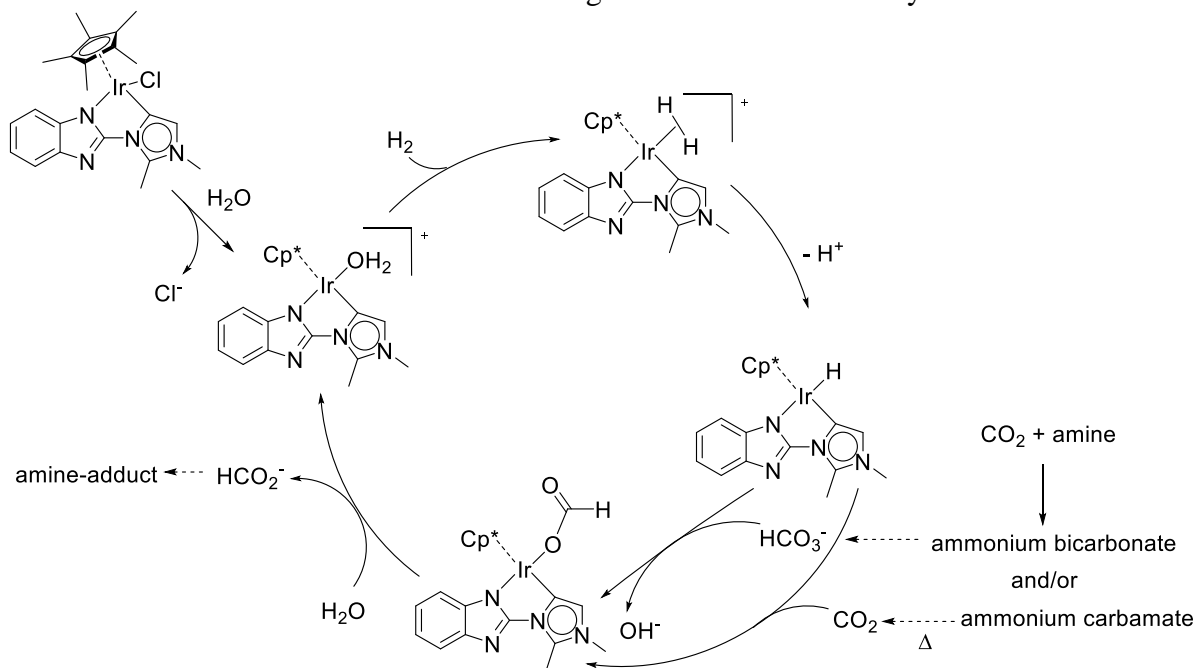

**Figure. S32.** Plausible catalytic cycle for the amine-assisted  $\text{CO}_2$ -hydrogenation reaction with  $[\text{Ir}]^{\text{imd}}$  catalyst.
